# Supplementary material for: Theoretical investigation on DNA/RNA base pairs mediated by copper, silver, and gold cations
Source: Royal Society of Chemistry journal article supplement (doi:10.1039/c1dt11028d), 2011-12-13
Supplement: c1dt11028d.pdf [file c1dt11028d.pdf]

Supporting information

Table S1. B3LYP optimized cartesian coordinates of all investigated species and relative zero point corrected energies.

|              |                            |                             |             |             |             |
|--------------|----------------------------|-----------------------------|-------------|-------------|-------------|
| Watson-Crick | AT                         |                             |             |             |             |
|              | $E_{ZPE}=-999.632307$ a.u. |                             |             |             |             |
|              | H                          | -4.27391200                 | 0.03403900  | -4.73427200 |             |
|              | N                          | -5.29781500                 | 0.03314100  | -4.94657100 |             |
|              | C                          | -5.62505300                 | 0.04770200  | -6.28704200 |             |
|              | N                          | -6.99904900                 | 0.04422900  | -6.54863600 |             |
|              | C                          | -7.39654500                 | 0.05897200  | -7.95564900 |             |
|              | C                          | -7.92205400                 | 0.02654300  | -5.52584800 |             |
|              | C                          | -7.59055800                 | 0.01187700  | -4.21161000 |             |
|              | C                          | -8.59697000                 | -0.00753600 | -3.09697700 |             |
|              | C                          | -6.17127200                 | 0.01493600  | -3.86703400 |             |
|              | O                          | -5.74903600                 | 0.00244100  | -2.70493500 |             |
|              | O                          | -4.79768200                 | 0.06273300  | -7.18852000 |             |
|              | H                          | -7.00456500                 | 0.95133500  | -8.45063800 |             |
|              | H                          | -6.99839200                 | -0.81898900 | -8.47110200 |             |
|              | H                          | -8.48654200                 | 0.05579800  | -8.01159700 |             |
|              | H                          | -8.95871900                 | 0.02507400  | -5.84876200 |             |
|              | H                          | -9.62048100                 | -0.00821100 | -3.48558700 |             |
|              | H                          | -8.46427100                 | -0.89321200 | -2.46493400 |             |
|              | H                          | -8.47387900                 | 0.86336100  | -2.44282400 |             |
|              | N                          | 0.19370300                  | -0.01818100 | -1.78057500 |             |
|              | C                          | 1.41300000                  | -0.01675000 | -2.26677900 |             |
|              | N                          | 1.46803200                  | 0.00405000  | -3.64697400 |             |
|              | C                          | 2.64290300                  | 0.01140200  | -4.50326700 |             |
|              | C                          | 0.15699900                  | 0.01676500  | -4.07481200 |             |
|              | N                          | -0.29336400                 | 0.03793400  | -5.33963000 |             |
|              | C                          | -1.62458000                 | 0.04480100  | -5.37886400 |             |
|              | N                          | -2.48750100                 | 0.03358000  | -4.34452000 |             |
|              | C                          | -2.01351700                 | 0.01231800  | -3.07668900 |             |
|              | N                          | -2.87978000                 | 0.00100200  | -2.04949900 |             |
|              | C                          | -0.60909900                 | 0.00289100  | -2.90601100 |             |
|              | H                          | 2.31872400                  | -0.03016100 | -1.67306800 |             |
|              | H                          | 3.25508200                  | 0.89941500  | -4.31612800 |             |
|              | H                          | 3.24826300                  | -0.88601500 | -4.34048100 |             |
|              | H                          | 2.29381700                  | 0.02688900  | -5.53730100 |             |
|              | H                          | -2.09282200                 | 0.06104300  | -6.36069900 |             |
|              | H                          | -3.88893200                 | 0.00895900  | -2.21782900 |             |
|              | H                          | -2.51874900                 | -0.01545000 | -1.10802700 |             |
|              |                            | AT-Cu                       |             |             |             |
|              |                            | $E_{ZPE}=-1196.345883$ a.u. |             |             |             |
|              |                            | N                           | -5.17146600 | 0.03363200  | -5.36573800 |
|              |                            | C                           | -5.81662800 | 0.05020800  | -6.57647100 |
|              |                            | N                           | -7.22274400 | 0.05034100  | -6.53445700 |
|              |                            | C                           | -7.92257100 | 0.06815400  | -7.81571700 |
|              |                            | C                           | -7.89517100 | 0.03448400  | -5.33622200 |
|              |                            | C                           | -7.26672600 | 0.01789300  | -4.13482300 |
|              |                            | C                           | -7.99208000 | 0.00041500  | -2.81949000 |
|              | C                          | -5.80652100                 | 0.01723700  | -4.14392600 |             |
|              | O                          | -5.14030300                 | 0.00225400  | -3.08322500 |             |
|              | O                          | -5.23505900                 | 0.06437400  | -7.66145500 |             |
|              | H                          | -7.64867800                 | 0.95999600  | -8.38604900 |             |
|              | H                          | -7.65077700                 | -0.80882800 | -8.40962000 |             |
|              | H                          | -8.99881100                 | 0.06696100  | -7.62946500 |             |
|              | H                          | -8.97863800                 | 0.03608900  | -5.41496800 |             |

|                             |             |             |             |
|-----------------------------|-------------|-------------|-------------|
| H                           | -9.07795200 | 0.00269000  | -2.96473700 |
| H                           | -7.72276100 | -0.88586400 | -2.23281700 |
| H                           | -7.72223500 | 0.87045100  | -2.20922100 |
| N                           | 0.61218600  | -0.02510400 | -1.60069000 |
| C                           | 1.90531200  | -0.02229800 | -1.82810700 |
| N                           | 2.23878300  | -0.00220900 | -3.16876100 |
| C                           | 3.56671400  | 0.00668300  | -3.76601400 |
| C                           | 1.04387500  | 0.00871700  | -3.84963600 |
| N                           | 0.85295000  | 0.02895900  | -5.18165300 |
| C                           | -0.42957600 | 0.03425700  | -5.49647300 |
| N                           | -1.49610200 | 0.02199500  | -4.64903600 |
| C                           | -1.28979600 | 0.00153700  | -3.29426400 |
| N                           | -2.32161000 | -0.01052000 | -2.44593700 |
| C                           | 0.05724800  | -0.00582100 | -2.86346200 |
| H                           | 2.67067900  | -0.03431200 | -1.06242200 |
| H                           | 4.12328700  | 0.89568200  | -3.45448800 |
| H                           | 4.12390200  | -0.89037600 | -3.47972900 |
| H                           | 3.44136200  | 0.02197900  | -4.84985200 |
| H                           | -0.68463600 | 0.05028200  | -6.55148200 |
| H                           | -3.30979000 | -0.00463000 | -2.75089400 |
| H                           | -2.11506300 | -0.02542400 | -1.45666500 |
| Cu                          | -3.30410900 | 0.03122800  | -5.24034700 |
| <b>AT-Ag</b>                |             |             |             |
| $E_{ZPE}=-1146.013948$ a.u. |             |             |             |
| N                           | -5.33349000 | 0.03599500  | -5.58261500 |
| C                           | -6.08663300 | 0.04965900  | -6.72594000 |
| N                           | -7.48428600 | 0.04565800  | -6.55169100 |
| C                           | -8.30210900 | 0.05971500  | -7.76079100 |
| C                           | -8.03979000 | 0.02918900  | -5.29519900 |
| C                           | -7.29991400 | 0.01565000  | -4.15918300 |
| C                           | -7.89697900 | -0.00249300 | -2.78083600 |
| C                           | -5.84569000 | 0.01900800  | -4.30657000 |
| O                           | -5.08525900 | 0.00703600  | -3.31131200 |
| O                           | -5.61219500 | 0.06455900  | -7.86200000 |
| H                           | -8.08794100 | 0.95275100  | -8.35434500 |
| H                           | -8.08286400 | -0.81584400 | -8.37798900 |
| H                           | -9.35605000 | 0.05290700  | -7.47390100 |
| H                           | -9.12585400 | 0.02768400  | -5.27049800 |
| H                           | -8.99178600 | -0.00360500 | -2.82173000 |
| H                           | -7.57020600 | -0.88719400 | -2.22158600 |
| H                           | -7.57286800 | 0.86889000  | -2.19953700 |
| N                           | 0.59875100  | -0.01784600 | -1.58013500 |
| C                           | 1.90667600  | -0.01788400 | -1.69549500 |
| N                           | 2.35432600  | -0.00120100 | -3.00261700 |
| C                           | 3.72841400  | 0.00388200  | -3.48412200 |
| C                           | 1.22206100  | 0.01036300  | -3.78344400 |
| N                           | 1.14526500  | 0.02807500  | -5.12690200 |
| C                           | -0.10723100 | 0.03532100  | -5.54721400 |
| N                           | -1.24081700 | 0.02709400  | -4.79586500 |
| C                           | -1.15175800 | 0.00885100  | -3.43059300 |
| N                           | -2.24412300 | -0.00009500 | -2.66057500 |
| C                           | 0.15476800  | 0.00006900  | -2.88595000 |
| H                           | 2.60342200  | -0.02968500 | -0.86682100 |
| H                           | 4.25771000  | 0.89358900  | -3.12998700 |
| H                           | 4.25790200  | -0.89244900 | -3.14748400 |
| H                           | 3.69605700  | 0.01461600  | -4.57477700 |
| H                           | -0.26935300 | 0.04956500  | -6.62071200 |
| H                           | -3.21163300 | 0.00467000  | -3.01983400 |
| H                           | -2.10546100 | -0.01370500 | -1.65934100 |
| Ag                          | -3.23679500 | 0.03785000  | -5.60282200 |

AT-Au

$E_{ZPE} = -1134.90676$  a.u.

|    |             |             |             |
|----|-------------|-------------|-------------|
| N  | -5.33618500 | 0.03308600  | -5.45727600 |
| C  | -6.01091300 | 0.04678200  | -6.65502700 |
| N  | -7.41457500 | 0.04545200  | -6.56420400 |
| C  | -8.15284100 | 0.05993600  | -7.82400900 |
| C  | -8.05121100 | 0.03088400  | -5.34657100 |
| C  | -7.38919500 | 0.01712400  | -4.16437900 |
| C  | -8.07666400 | 0.00105800  | -2.82895100 |
| C  | -5.92857700 | 0.01786600  | -4.20515200 |
| O  | -5.23723500 | 0.00602200  | -3.16741300 |
| O  | -5.46691800 | 0.05999800  | -7.75563400 |
| H  | -7.89752100 | 0.95099900  | -8.40397500 |
| H  | -7.89788300 | -0.81778300 | -8.42414200 |
| H  | -9.22277500 | 0.05768600  | -7.60467700 |
| H  | -9.13636500 | 0.03109200  | -5.39381500 |
| H  | -9.16617000 | 0.00182100  | -2.94315600 |
| H  | -7.78915500 | -0.88380200 | -2.24887800 |
| H  | -7.79009300 | 0.87232100  | -2.22819900 |
| N  | 0.70839900  | -0.02043300 | -1.57174600 |
| C  | 2.00836800  | -0.01812800 | -1.75715600 |
| N  | 2.38575200  | 0.00072000  | -3.08597200 |
| C  | 3.73275500  | 0.00890200  | -3.63990000 |
| C  | 1.21402600  | 0.01118800  | -3.80542300 |
| N  | 1.06639200  | 0.03020400  | -5.14262600 |
| C  | -0.20303500 | 0.03510600  | -5.50180900 |
| N  | -1.29238200 | 0.02339400  | -4.68413900 |
| C  | -1.13659100 | 0.00424100  | -3.32387800 |
| N  | -2.19086500 | -0.00699500 | -2.50049500 |
| C  | 0.19586500  | -0.00253600 | -2.85174800 |
| H  | 2.74815900  | -0.02946600 | -0.96672400 |
| H  | 4.27851400  | 0.89833000  | -3.31128400 |
| H  | 4.27986800  | -0.88788100 | -3.33435600 |
| H  | 3.64270700  | 0.02290000  | -4.72722800 |
| H  | -0.42999300 | 0.04992100  | -6.56230400 |
| H  | -3.16410000 | -0.00100800 | -2.82997000 |
| H  | -2.01038200 | -0.02043600 | -1.50610300 |
| Au | -3.28491300 | 0.03208200  | -5.35209400 |

GC

$E_{ZPE} = -1015.703609$  a.u.

|   |             |             |            |
|---|-------------|-------------|------------|
| H | 0.00000000  | 0.00000000  | 0.00000000 |
| N | 0.00000000  | 0.00000000  | 1.92312000 |
| C | 1.21349000  | 0.00000000  | 2.53129400 |
| N | 1.25437500  | 0.01754600  | 3.95031600 |
| C | 2.57186200  | 0.01956700  | 4.58380800 |
| C | 0.09963700  | 0.03076000  | 4.67169500 |
| C | -1.11806900 | 0.02695900  | 4.06939500 |
| C | -1.13570600 | 0.00843200  | 2.63071400 |
| N | -2.29235500 | 0.00137700  | 1.95638100 |
| O | 2.29206900  | -0.01477700 | 1.92450700 |
| H | 3.12900900  | -0.87506700 | 4.29479500 |
| H | 3.14192400  | 0.89369400  | 4.25983300 |
| H | 2.44298100  | 0.04180600  | 5.66810400 |
| H | 0.21274500  | 0.04374700  | 5.75098800 |
| H | -2.03104200 | 0.03669300  | 4.65205300 |
| H | -3.16952000 | -0.00819900 | 2.45364700 |

|   |             |             |             |
|---|-------------|-------------|-------------|
| H | -2.30091500 | -0.04052400 | 0.92107200  |
| N | -0.03314500 | -0.04281600 | -1.03145300 |
| C | 1.15118000  | -0.02722200 | -1.73064000 |
| N | 2.28395200  | 0.10500900  | -1.00167500 |
| N | 1.21861400  | -0.11142100 | -3.05121000 |
| C | -0.00018800 | -0.20388500 | -3.62502400 |
| N | -0.24264900 | -0.30219700 | -4.97471200 |
| C | 0.76215000  | -0.32227400 | -6.02234700 |
| C | -1.62214000 | -0.37297800 | -5.10880600 |
| N | -2.26277600 | -0.32867800 | -3.96993500 |
| C | -1.26198300 | -0.22191800 | -3.02059200 |
| C | -1.32407300 | -0.13811200 | -1.59318000 |
| O | -2.32168900 | -0.14221400 | -0.85688300 |
| H | 2.28941800  | 0.04071300  | 0.01977300  |
| H | 3.15149800  | 0.00783600  | -1.50577400 |
| H | 1.74033300  | -0.25096100 | -5.54366700 |
| H | 0.63291700  | 0.52544700  | -6.70373800 |
| H | 0.70939900  | -1.25396600 | -6.59573200 |
| H | -2.08271300 | -0.45654700 | -6.08542400 |

GC-Cu

$E_{ZPE} = -1212.443491$  a.u.

|    |             |             |             |
|----|-------------|-------------|-------------|
| Cu | 0.00000000  | 0.00000000  | 0.00000000  |
| N  | 0.00000000  | 0.00000000  | 1.90598500  |
| C  | 1.22558200  | 0.00000000  | 2.53795900  |
| N  | 1.22052900  | 0.02166700  | 3.95321000  |
| C  | 2.52632000  | 0.02831800  | 4.61503900  |
| C  | 0.05119500  | 0.03515600  | 4.64886300  |
| C  | -1.15570300 | 0.02614900  | 4.02513600  |
| C  | -1.16455700 | 0.00441600  | 2.59047600  |
| N  | -2.30945200 | -0.01014200 | 1.90542300  |
| O  | 2.29233400  | -0.01700900 | 1.93728300  |
| H  | 3.09327900  | -0.86116500 | 4.33051000  |
| H  | 3.09563900  | 0.90916000  | 4.30887100  |
| H  | 2.37257200  | 0.04177700  | 5.69580700  |
| H  | 0.14112700  | 0.05196000  | 5.72999500  |
| H  | -2.07837900 | 0.03456400  | 4.59121100  |
| H  | -3.18829900 | -0.01100000 | 2.40174600  |
| H  | -2.33186800 | -0.04752000 | 0.86514000  |
| N  | -0.42980800 | -0.01590100 | -1.83259700 |
| C  | 0.37303200  | 0.04507400  | -2.93045700 |
| N  | 1.72633800  | 0.18532700  | -2.69712100 |
| N  | -0.02502500 | 0.02320000  | -4.19868700 |
| C  | -1.36600500 | -0.04897900 | -4.30296000 |
| N  | -2.08974700 | -0.08007300 | -5.47257800 |
| C  | -1.54278400 | -0.04636000 | -6.81620500 |
| C  | -3.42114300 | -0.15708900 | -5.08931300 |
| N  | -3.59529000 | -0.17543800 | -3.79314600 |
| C  | -2.31186100 | -0.10831800 | -3.27556800 |
| C  | -1.82573600 | -0.09234900 | -1.93147900 |
| O  | -2.51540100 | -0.14061100 | -0.88350500 |
| H  | 2.06849700  | -0.14218400 | -1.80309800 |
| H  | 2.30857400  | -0.03966200 | -3.49234600 |
| H  | -0.46496700 | 0.10380500  | -6.73095400 |
| H  | -1.73199600 | -0.98823700 | -7.34332000 |
| H  | -1.97681700 | 0.77842000  | -7.39109500 |
| H  | -4.21140200 | -0.19422600 | -5.82910800 |

GC-Ag

| E <sub>ZPE</sub> =-1162.077363 a.u. |             |             |             |
|-------------------------------------|-------------|-------------|-------------|
| Ag                                  | 0.00000000  | 0.00000000  | 0.00000000  |
| N                                   | 0.00000000  | 0.00000000  | 2.16170300  |
| C                                   | 1.22748000  | 0.00000000  | 2.78252800  |
| N                                   | 1.23405400  | 0.01124700  | 4.19900100  |
| C                                   | 2.54380900  | 0.01651100  | 4.85228700  |
| C                                   | 0.06892700  | 0.01378200  | 4.90185300  |
| C                                   | -1.14180600 | 0.00790300  | 4.28604500  |
| C                                   | -1.15778600 | 0.00148200  | 2.84949200  |
| N                                   | -2.31256600 | -0.00273400 | 2.17871000  |
| O                                   | 2.29033900  | -0.00869300 | 2.17411700  |
| H                                   | 3.11282400  | 0.89521300  | 4.53979100  |
| H                                   | 3.10775700  | -0.87478200 | 4.56700000  |
| H                                   | 2.39742400  | 0.03367000  | 5.93408800  |
| H                                   | 0.16553700  | 0.02048500  | 5.98260000  |
| H                                   | -2.06058100 | 0.00971000  | 4.85853700  |
| H                                   | -3.18347900 | 0.00028700  | 2.68866800  |
| H                                   | -2.36392000 | -0.00986500 | 1.14291600  |
| N                                   | -0.83465400 | -0.01431600 | -1.95295000 |
| C                                   | -0.26452600 | 0.00942800  | -3.18507500 |
| N                                   | 1.11831400  | 0.05092000  | -3.22703000 |
| N                                   | -0.90202800 | 0.03718700  | -4.35266800 |
| C                                   | -2.23912200 | 0.05637200  | -4.19101700 |
| N                                   | -3.18015900 | 0.09252600  | -5.19446600 |
| C                                   | -2.90800100 | 0.12647000  | -6.61925500 |
| C                                   | -4.41143300 | 0.09291700  | -4.55477500 |
| N                                   | -4.32663700 | 0.05976900  | -3.24986900 |
| C                                   | -2.96444300 | 0.03628200  | -2.99745100 |
| C                                   | -2.22452800 | -0.00372000 | -1.77343300 |
| O                                   | -2.70561700 | -0.02575100 | -0.61548000 |
| H                                   | 1.59582300  | -0.37161500 | -2.44174600 |
| H                                   | 1.49979800  | -0.19321300 | -4.13157900 |
| H                                   | -1.82420600 | 0.11530900  | -6.74885800 |
| H                                   | -3.33855700 | -0.74677300 | -7.12147100 |
| H                                   | -3.31390000 | 1.03651400  | -7.07434900 |
| H                                   | -5.33319100 | 0.11899800  | -5.12317600 |
| GC-Au                               |             |             |             |
| E <sub>ZPE</sub> =-1150.985942 a.u. |             |             |             |
| N                                   | -3.67708400 | -0.89706800 | -0.02855700 |
| C                                   | -3.95152600 | -2.33480700 | -0.07313600 |
| H                                   | -4.46332500 | -2.58783200 | -1.00455500 |
| H                                   | -4.59903500 | -2.61666100 | 0.76035600  |
| H                                   | -3.00503200 | -2.87496600 | -0.00943500 |
| C                                   | -2.41619700 | -0.40011300 | 0.07612300  |
| C                                   | -2.17117000 | 0.93541700  | 0.11694000  |
| C                                   | -3.29429700 | 1.82469100  | 0.04326900  |
| N                                   | -4.54283200 | 1.31950700  | -0.06342400 |
| C                                   | -4.80130800 | -0.03817100 | -0.10043400 |
| N                                   | -3.11546900 | 3.14891600  | 0.07919400  |
| O                                   | -5.92082100 | -0.51490800 | -0.18973800 |
| O                                   | -5.04779500 | 5.33971400  | -0.02702000 |
| C                                   | -6.27246100 | 5.55893300  | -0.13083900 |
| N                                   | -7.18191300 | 4.48312100  | -0.23639200 |
| C                                   | -8.52876500 | 4.65789800  | -0.35449700 |
| N                                   | -9.29172600 | 3.52186300  | -0.51390200 |
| N                                   | -9.16117900 | 5.82550500  | -0.36886900 |
| C                                   | -8.30885600 | 6.86477900  | -0.27201000 |
| C                                   | -6.91749300 | 6.83629900  | -0.15628500 |

|                               |              |             |             |
|-------------------------------|--------------|-------------|-------------|
| N                             | -6.40416400  | 8.12038100  | -0.07893900 |
| C                             | -7.45781000  | 8.89248800  | -0.14661400 |
| N                             | -8.65230700  | 8.19687400  | -0.26573700 |
| C                             | -9.99799600  | 8.73188300  | -0.35950800 |
| H                             | -3.89137400  | 3.83455400  | 0.03103900  |
| H                             | -2.17847200  | 3.51696900  | 0.15577400  |
| H                             | -1.16173100  | 1.31660100  | 0.20110800  |
| H                             | -1.61800700  | -1.13331900 | 0.12561700  |
| Au                            | -6.12238600  | 2.71063500  | -0.17913900 |
| H                             | -8.89418600  | 2.65501900  | -0.17591900 |
| H                             | -10.27687900 | 3.65509100  | -0.33168600 |
| H                             | -10.27786800 | 9.25818200  | 0.55986300  |
| H                             | -10.08418200 | 9.42094900  | -1.20627800 |
| H                             | -10.67833800 | 7.89172300  | -0.51039500 |
| H                             | -7.44523500  | 9.97518600  | -0.11815500 |
| <b>AU</b>                     |              |             |             |
| $E_{ZPE} = -960.354436$ a.u.  |              |             |             |
| H                             | -0.00220000  | -0.04423400 | -0.00964100 |
| N                             | 1.04375600   | -0.03613400 | -0.01006700 |
| C                             | 1.64297600   | -1.27794100 | -0.01808600 |
| N                             | 3.04710000   | -1.25474900 | -0.01835800 |
| C                             | 3.72162800   | -2.55226900 | -0.02715000 |
| C                             | 3.73681300   | -0.06716500 | -0.01094900 |
| C                             | 1.67351400   | 1.20700600  | -0.00233600 |
| O                             | 1.01800100   | 2.25279000  | 0.00461300  |
| O                             | 1.02415100   | -2.33241000 | -0.02478200 |
| H                             | 3.43644000   | -3.13290700 | 0.85389200  |
| H                             | 3.43755300   | -3.12047200 | -0.91664400 |
| H                             | 4.80035100   | -2.38580100 | -0.02532400 |
| H                             | 4.81775100   | -0.16367000 | -0.01187900 |
| N                             | -4.98142900  | 1.92762600  | 0.01338700  |
| C                             | -6.07530100  | 1.20206100  | 0.01233100  |
| N                             | -5.84637600  | -0.16028800 | 0.00307300  |
| C                             | -6.82107500  | -1.23896800 | -0.00067800 |
| C                             | -4.47550100  | -0.31053800 | -0.00176400 |
| N                             | -3.77524000  | -1.45629800 | -0.01089600 |
| C                             | -2.46432400  | -1.22173200 | -0.01360500 |
| N                             | -1.83132000  | -0.03258100 | -0.00864300 |
| C                             | -2.55545900  | 1.11147600  | 0.00047200  |
| N                             | -1.91907200  | 2.29464900  | 0.00553000  |
| C                             | -3.96509300  | 0.99040700  | 0.00439100  |
| H                             | -7.08345900  | 1.59773400  | 0.01780300  |
| H                             | -7.44930000  | -1.19877900 | 0.89493800  |
| H                             | -7.45651700  | -1.18597000 | -0.89050800 |
| H                             | -6.26787800  | -2.17982300 | -0.00964400 |
| H                             | -1.80520300  | -2.08718800 | -0.02076100 |
| H                             | -0.89674600  | 2.33823100  | 0.00155100  |
| H                             | -2.46623500  | 3.14178200  | 0.01243800  |
| C                             | 3.12459400   | 1.14009200  | -0.00299800 |
| H                             | 3.68736300   | 2.06365400  | 0.00283600  |
| <b>AU-Cu</b>                  |              |             |             |
| $E_{ZPE} = -1157.103002$ a.u. |              |             |             |
| N                             | 0.76350700   | -0.42518700 | -0.01127800 |
| C                             | 1.66146700   | -1.46114000 | -0.01777000 |
| N                             | 3.03050700   | -1.11196400 | -0.01823500 |
| C                             | 3.99228300   | -2.21075000 | -0.02530100 |
| C                             | 3.42079300   | 0.20124100  | -0.01297000 |

|                                            |             |             |             |
|--------------------------------------------|-------------|-------------|-------------|
| C                                          | 1.11048900  | 0.91133700  | -0.00576700 |
| O                                          | 0.22487400  | 1.79459300  | 0.00005700  |
| O                                          | 1.33955200  | -2.64825400 | -0.02264000 |
| H                                          | 3.85259400  | -2.84281800 | 0.85575600  |
| H                                          | 3.85121800  | -2.83281400 | -0.91326200 |
| H                                          | 5.00213200  | -1.79445100 | -0.02374300 |
| H                                          | 4.49366800  | 0.36786300  | -0.01397700 |
| N                                          | -5.70850400 | 1.98639700  | 0.01362300  |
| C                                          | -6.91988200 | 1.47995000  | 0.01264800  |
| N                                          | -6.95006500 | 0.09858200  | 0.00486500  |
| C                                          | -8.11393800 | -0.77633900 | 0.00216900  |
| C                                          | -5.63457000 | -0.30260800 | 0.00031500  |
| N                                          | -5.15508500 | -1.56009400 | -0.00779400 |
| C                                          | -3.83472100 | -1.58483400 | -0.01050300 |
| N                                          | -2.98092500 | -0.52331600 | -0.00613100 |
| C                                          | -3.48042200 | 0.75303500  | 0.00165200  |
| N                                          | -2.66086400 | 1.80768400  | 0.00494900  |
| C                                          | -4.88928500 | 0.87659600  | 0.00547300  |
| H                                          | -7.83500000 | 2.05852500  | 0.01761200  |
| H                                          | -8.71987200 | -0.61385000 | 0.89856400  |
| H                                          | -8.72561600 | -0.60049300 | -0.88776200 |
| H                                          | -7.75295400 | -1.80602300 | -0.00664600 |
| H                                          | -3.35324800 | -2.55770000 | -0.01669800 |
| H                                          | -1.62988300 | 1.72706200  | 0.00269800  |
| H                                          | -3.08008200 | 2.72728400  | 0.01189400  |
| C                                          | 2.52900200  | 1.22036400  | -0.00676300 |
| H                                          | 2.84545300  | 2.25507300  | -0.00249100 |
| Cu                                         | -1.08732000 | -0.70374300 | -0.01001400 |
| <b>AU-Ag</b>                               |             |             |             |
| <b>E<sub>ZPE</sub> = -1106.736641 a.u.</b> |             |             |             |
| N                                          | 0.95742300  | -0.59066800 | -0.01371500 |
| C                                          | 1.94571900  | -1.53665200 | -0.02054800 |
| N                                          | 3.27731700  | -1.05948100 | -0.02037900 |
| C                                          | 4.33859300  | -2.06196900 | -0.02781000 |
| C                                          | 3.54055200  | 0.28489600  | -0.01373300 |
| C                                          | 1.17148000  | 0.77143100  | -0.00695000 |
| O                                          | 0.20805700  | 1.56896800  | -0.00002600 |
| O                                          | 1.73966200  | -2.74951600 | -0.02670600 |
| H                                          | 4.25969400  | -2.70504500 | 0.85287700  |
| H                                          | 4.25711600  | -2.69474800 | -0.91570500 |
| H                                          | 5.30482600  | -1.55239100 | -0.02626100 |
| H                                          | 4.59263100  | 0.55353000  | -0.01420500 |
| N                                          | -5.71770300 | 2.00505800  | 0.01329000  |
| C                                          | -6.96761000 | 1.60295600  | 0.01326400  |
| N                                          | -7.11458800 | 0.22905700  | 0.00645100  |
| C                                          | -8.34767800 | -0.54514700 | 0.00497700  |
| C                                          | -5.83745000 | -0.28167300 | 0.00165400  |
| N                                          | -5.46490400 | -1.57494300 | -0.00567600 |
| C                                          | -4.15043000 | -1.70736600 | -0.00866200 |
| N                                          | -3.21153600 | -0.72360000 | -0.00515300 |
| C                                          | -3.60084000 | 0.58818300  | 0.00259200  |
| N                                          | -2.70624900 | 1.58093800  | 0.00684900  |
| C                                          | -4.99553100 | 0.82992900  | 0.00607000  |
| H                                          | -7.83056200 | 2.25685500  | 0.01799900  |
| H                                          | -8.93751100 | -0.33234900 | 0.90161400  |
| H                                          | -8.94332700 | -0.31939100 | -0.88460100 |
| H                                          | -8.07405700 | -1.60142400 | -0.00353700 |
| H                                          | -3.75394300 | -2.71814500 | -0.01464000 |
| H                                          | -1.68318400 | 1.44484700  | 0.00345800  |
| H                                          | -3.06294600 | 2.52679700  | 0.01167400  |

|        |                                     |             |             |             |
|--------|-------------------------------------|-------------|-------------|-------------|
|        | C                                   | 2.55565100  | 1.21418400  | -0.00701700 |
|        | H                                   | 2.77247600  | 2.27426000  | -0.00174700 |
|        | Ag                                  | -1.08583000 | -1.06574300 | -0.01211500 |
|        | AU-Au                               |             |             |             |
|        | E <sub>ZPE</sub> =-1095.646754 a.u. |             |             |             |
|        | N                                   | 0.96023000  | -0.47804000 | -0.01215000 |
|        | C                                   | 1.88018800  | -1.49777000 | -0.01942300 |
|        | N                                   | 3.23729600  | -1.10598700 | -0.01937800 |
|        | C                                   | 4.22860900  | -2.17848500 | -0.02733600 |
|        | C                                   | 3.59251900  | 0.21732300  | -0.01268900 |
|        | C                                   | 1.26221900  | 0.87814900  | -0.00510000 |
|        | O                                   | 0.35885800  | 1.73469000  | 0.00104800  |
|        | O                                   | 1.59342800  | -2.69061000 | -0.02575500 |
|        | H                                   | 4.10642500  | -2.81482100 | 0.85319800  |
|        | H                                   | 4.10464700  | -2.80347800 | -0.91573400 |
|        | H                                   | 5.22647100  | -1.73431100 | -0.02549000 |
|        | H                                   | 4.66062500  | 0.41169200  | -0.01341600 |
|        | N                                   | -5.79345300 | 2.00014800  | 0.01276800  |
|        | C                                   | -7.02081000 | 1.53341000  | 0.01313200  |
|        | N                                   | -7.09667500 | 0.15398900  | 0.00599400  |
|        | C                                   | -8.28876000 | -0.68276400 | 0.00456300  |
|        | C                                   | -5.79540000 | -0.29023900 | 0.00061900  |
|        | N                                   | -5.35741700 | -1.56246000 | -0.00719900 |
|        | C                                   | -4.04006600 | -1.63368500 | -0.01034200 |
|        | N                                   | -3.15740700 | -0.59624500 | -0.00670100 |
|        | C                                   | -3.60830900 | 0.69660100  | 0.00115100  |
|        | N                                   | -2.76120100 | 1.73190200  | 0.00452000  |
|        | C                                   | -5.01198200 | 0.86414100  | 0.00513900  |
|        | H                                   | -7.91632000 | 2.14188500  | 0.01837300  |
|        | H                                   | -8.88830500 | -0.49962000 | 0.90115300  |
|        | H                                   | -8.89443900 | -0.48759900 | -0.88533200 |
|        | H                                   | -7.96147200 | -1.72362400 | -0.00354700 |
|        | H                                   | -3.58445500 | -2.61791200 | -0.01665600 |
|        | H                                   | -1.73945400 | 1.62530900  | 0.00282000  |
|        | H                                   | -3.15647200 | 2.66210400  | 0.01112800  |
|        | C                                   | 2.67601300  | 1.21296000  | -0.00564800 |
|        | H                                   | 2.96701200  | 2.25499200  | -0.00038500 |
|        | Au                                  | -1.06685100 | -0.81400600 | -0.01090000 |
| Wobble | GU                                  |             |             |             |
|        | E <sub>ZPE</sub> =-1035.58731 a.u.  |             |             |             |
|        | H                                   | -2.71278400 | 0.00612900  | -7.19802000 |
|        | N                                   | -3.57056100 | 0.03525800  | -7.78220300 |
|        | C                                   | -4.76357900 | 0.04197800  | -7.11407500 |
|        | N                                   | -5.90757500 | 0.08210400  | -7.90578600 |
|        | C                                   | -7.19726300 | 0.08663500  | -7.21564700 |
|        | C                                   | -5.81571900 | 0.11498800  | -9.28334500 |
|        | C                                   | -4.63511800 | 0.10897800  | -9.93503800 |
|        | C                                   | -3.38289900 | 0.06680900  | -9.18644500 |
|        | O                                   | -2.26558400 | 0.05818500  | -9.66979400 |
|        | O                                   | -4.86967800 | 0.01412000  | -5.87974900 |
|        | H                                   | -7.29757300 | -0.80503700 | -6.59171800 |
|        | H                                   | -7.28518900 | 0.96842100  | -6.57539800 |
|        | H                                   | -7.99107200 | 0.09959800  | -7.96430500 |
|        | H                                   | -6.76717800 | 0.14558800  | -9.80352100 |
|        | N                                   | 1.08759500  | -0.00560000 | -3.99569000 |



|   |             |             |              |
|---|-------------|-------------|--------------|
| C | 1.54796200  | 0.00647400  | -2.77144600  |
| N | 0.55485100  | -0.01442900 | -1.80371200  |
| C | 0.71224300  | -0.01062300 | -0.35939100  |
| C | -0.63461900 | -0.04331100 | -2.48901100  |
| N | -1.86815600 | -0.06379200 | -1.92641400  |
| C | -2.82540400 | -0.09591100 | -2.82911900  |
| C | -1.33956900 | -0.05740500 | -4.81521500  |
| C | -0.28468900 | -0.03803800 | -3.84320600  |
| H | 2.59468300  | 0.02995400  | -2.49508400  |
| H | 1.27663700  | -0.88846600 | -0.02835400  |
| H | 1.22970200  | 0.89545400  | -0.02752800  |
| H | -0.28432800 | -0.03741400 | 0.08437000   |
| H | -4.58328800 | 0.13472900  | -11.01528300 |
| O | -1.27895400 | -0.04374500 | -6.04790800  |
| N | -4.13710800 | -0.18019200 | -2.43273800  |
| H | -4.29991500 | 0.06005400  | -1.46488500  |
| H | -4.84736000 | 0.11706900  | -3.08894400  |
| N | -2.60395700 | -0.09495600 | -4.17927100  |
| H | -3.41080200 | -0.10752400 | -4.81728200  |

GU-Cu

$E_{ZPE} = -1232.316328$  a.u.

|    |             |             |              |
|----|-------------|-------------|--------------|
| H  | -3.19218400 | 0.10184800  | -7.15554600  |
| N  | -3.90142000 | 0.09507100  | -7.92009000  |
| C  | -5.20571300 | 0.04833700  | -7.55624000  |
| N  | -6.14935200 | 0.03401500  | -8.55920100  |
| C  | -7.56405800 | -0.01863800 | -8.17397900  |
| C  | -5.75748000 | 0.06710200  | -9.88702300  |
| C  | -4.46400700 | 0.11500200  | -10.26067700 |
| C  | -3.40540900 | 0.13357900  | -9.25595600  |
| O  | -2.21278000 | 0.17683800  | -9.47633700  |
| O  | -5.61026000 | 0.01709400  | -6.36192400  |
| H  | -7.76482100 | -0.91995500 | -7.59023800  |
| H  | -7.82656900 | 0.85446300  | -7.57193800  |
| H  | -8.16536900 | -0.02997600 | -9.08398200  |
| H  | -6.57284700 | 0.05146300  | -10.60134700 |
| N  | 0.69869900  | 0.00845700  | -4.28282600  |
| C  | 1.41107300  | -0.04420200 | -3.18764100  |
| N  | 0.65040600  | -0.07691700 | -2.02728700  |
| C  | 1.11322000  | -0.13213100 | -0.65260900  |
| C  | -0.66050900 | -0.03927600 | -2.43994800  |
| N  | -1.74677400 | -0.04646800 | -1.64166100  |
| C  | -2.87663700 | -0.01316400 | -2.33811100  |
| C  | -1.85765900 | 0.05500900  | -4.53377400  |
| C  | -0.61205400 | 0.01289400  | -3.83685000  |
| H  | 2.49306600  | -0.06436200 | -3.14399600  |
| H  | 1.75780900  | -1.00319100 | -0.49522700  |
| H  | 1.66647200  | 0.77542600  | -0.38696800  |
| H  | 0.23471400  | -0.21534400 | -0.01021900  |
| H  | -4.17591500 | 0.14037000  | -11.30321700 |
| O  | -2.03904300 | 0.10089300  | -5.77509500  |
| N  | -4.06248400 | -0.07607300 | -1.62839200  |
| H  | -3.95655500 | 0.15136900  | -0.64830300  |
| H  | -4.86287500 | 0.35141300  | -2.07571200  |
| N  | -2.98069200 | 0.03691400  | -3.69310100  |
| Cu | -4.42733800 | 0.02622400  | -4.88626600  |

GU-Ag

$E_{ZPE} = -1181.951984$  a.u.

|    |             |             |              |
|----|-------------|-------------|--------------|
| H  | -3.30188400 | 0.10140500  | -6.86970400  |
| N  | -3.93823000 | 0.10255500  | -7.69046500  |
| C  | -5.27680800 | 0.03460400  | -7.46503300  |
| N  | -6.10161200 | 0.02675800  | -8.57283700  |
| C  | -7.54826600 | -0.04953600 | -8.34588000  |
| C  | -5.56941500 | 0.08905100  | -9.84886900  |
| C  | -4.24423800 | 0.15971500  | -10.07960400 |
| C  | -3.30228100 | 0.17238100  | -8.96550400  |
| O  | -2.09365000 | 0.23497300  | -9.05539900  |
| O  | -5.81179900 | -0.02084800 | -6.33011400  |
| H  | -7.80013600 | -0.96459000 | -7.80477500  |
| H  | -7.88694100 | 0.80765400  | -7.75921300  |
| H  | -8.04706200 | -0.04910500 | -9.31602500  |
| H  | -6.30214600 | 0.07690600  | -10.64797900 |
| N  | 0.69197100  | -0.00719100 | -4.17170300  |
| C  | 1.49955200  | -0.05630700 | -3.14460400  |
| N  | 0.84589600  | -0.08281200 | -1.92051300  |
| C  | 1.42921400  | -0.14050300 | -0.59280900  |
| C  | -0.49685900 | -0.04723300 | -2.21469500  |
| N  | -1.50780400 | -0.04836300 | -1.32313300  |
| C  | -2.69460700 | -0.01571800 | -1.92068600  |
| C  | -1.87632100 | 0.04057000  | -4.19694300  |
| C  | -0.57357200 | -0.00017700 | -3.61006900  |
| H  | 2.58121500  | -0.07598100 | -3.19776600  |
| H  | 2.02039900  | -1.05365200 | -0.46443400  |
| H  | 2.06972000  | 0.72888500  | -0.40913900  |
| H  | 0.61047200  | -0.14076100 | 0.12902500   |
| H  | -3.84447700 | 0.20819600  | -11.08366300 |
| O  | -2.15754800 | 0.07817400  | -5.41884300  |
| N  | -3.81375700 | -0.07258100 | -1.10542200  |
| H  | -3.61009500 | 0.15314800  | -0.14011400  |
| H  | -4.63775300 | 0.38604000  | -1.47158900  |
| N  | -2.91817800 | 0.02778900  | -3.25814100  |
| Ag | -4.63962300 | -0.01193400 | -4.49688500  |

GU-Au

$E_{ZPE} = -1170.854559$  a.u.

|   |             |             |              |
|---|-------------|-------------|--------------|
| H | -3.38800200 | 0.06522200  | -7.08926600  |
| N | -4.05802800 | 0.07220200  | -7.88304500  |
| C | -5.38917200 | 0.04903300  | -7.61565900  |
| N | -6.25190400 | 0.05531600  | -8.68836700  |
| C | -7.69326500 | 0.02856800  | -8.41141900  |
| C | -5.76336200 | 0.08441400  | -9.98365200  |
| C | -4.44600600 | 0.10830400  | -10.26227800 |
| C | -3.46398900 | 0.10441500  | -9.18391600  |
| O | -2.25892100 | 0.12418800  | -9.31367200  |
| O | -5.90004400 | 0.02251000  | -6.46065500  |
| H | -7.95514200 | -0.87225200 | -7.85183500  |
| H | -7.98300400 | 0.90290100  | -7.82418600  |
| H | -8.22302300 | 0.03513200  | -9.36479200  |
| H | -6.52484200 | 0.08637900  | -10.75518400 |
| N | 0.78777500  | 0.00421000  | -4.21859700  |
| C | 1.50240400  | -0.02413100 | -3.12378200  |
| N | 0.74313200  | -0.05192800 | -1.96273000  |
| C | 1.20677300  | -0.09110500 | -0.58770600  |
| C | -0.56817100 | -0.04043700 | -2.37519700  |
| N | -1.65229400 | -0.05411800 | -1.57209600  |
| C | -2.78618900 | -0.04427600 | -2.25824600  |
| C | -1.76273000 | 0.01532400  | -4.48394700  |

|          |                               |             |             |              |
|----------|-------------------------------|-------------|-------------|--------------|
|          | C                             | -0.52165500 | -0.00574800 | -3.77094700  |
|          | H                             | 2.58460300  | -0.02701200 | -3.08112200  |
|          | H                             | 1.80603300  | -0.98912700 | -0.40326800  |
|          | H                             | 1.80697400  | 0.79436500  | -0.35234900  |
|          | H                             | 0.32719000  | -0.10953800 | 0.05828500   |
|          | H                             | -4.08147200 | 0.13070700  | -11.28056200 |
|          | O                             | -1.93525500 | 0.04995900  | -5.71651300  |
|          | N                             | -3.96585700 | -0.11942800 | -1.54797300  |
|          | H                             | -3.86830800 | 0.12019600  | -0.57048800  |
|          | H                             | -4.78781500 | 0.25231000  | -2.00585100  |
|          | N                             | -2.88413000 | -0.00710500 | -3.61773900  |
|          | Au                            | -4.56054200 | 0.00300600  | -4.78921400  |
| Hoogsten | AT                            |             |             |              |
|          | $E_{ZPE} = -999.632583$ a.u.  |             |             |              |
|          | N                             | 1.23287500  | -4.87146400 | 0.01766800   |
|          | C                             | 2.42497300  | -4.17820400 | 0.02598100   |
|          | C                             | 2.51137800  | -2.82561800 | 0.03632300   |
|          | C                             | 1.26505800  | -2.06321700 | 0.03857000   |
|          | N                             | 0.10539900  | -2.82725600 | 0.03019700   |
|          | C                             | 0.00626700  | -4.20224600 | 0.01927000   |
|          | O                             | 1.21337300  | -0.82915800 | 0.04756700   |
|          | O                             | -1.06011700 | -4.80617000 | 0.01133000   |
|          | C                             | 1.18335300  | -6.33272500 | 0.00552500   |
|          | N                             | -2.44307500 | -1.55779600 | 0.02621900   |
|          | C                             | -2.92806600 | -0.26243700 | 0.03118300   |
|          | C                             | -4.32489900 | -0.27025800 | 0.02302200   |
|          | N                             | -4.68651200 | -1.60645500 | 0.01292900   |
|          | C                             | -3.51358300 | -2.32157000 | 0.01544200   |
|          | C                             | -2.30529000 | 1.00988000  | 0.04232300   |
|          | N                             | -3.10150500 | 2.10209900  | 0.04427600   |
|          | C                             | -4.43100200 | 1.93250700  | 0.03567800   |
|          | N                             | -5.13589800 | 0.79515900  | 0.02475800   |
|          | N                             | -0.97060500 | 1.18236500  | 0.05116900   |
|          | C                             | -6.04921400 | -2.11517600 | 0.00134500   |
|          | H                             | -5.01524500 | 2.85109200  | 0.03783500   |
|          | H                             | -3.48579800 | -3.40383300 | 0.00907200   |
|          | H                             | -6.24112000 | -2.72960800 | 0.88643400   |
|          | H                             | -6.23390100 | -2.70936200 | -0.89901900  |
|          | H                             | -6.71852100 | -1.25313000 | 0.00827600   |
|          | H                             | -0.30371600 | 0.41021400  | 0.04821600   |
|          | H                             | -0.62698700 | 2.13135600  | 0.05737500   |
|          | H                             | 3.31322700  | -4.80246000 | 0.02326300   |
|          | H                             | -0.80412000 | -2.31678000 | 0.03086500   |
|          | H                             | 2.20460000  | -6.71764700 | 0.00801600   |
|          | H                             | 0.65875800  | -6.68696300 | -0.88576400  |
|          | H                             | 0.64908900  | -6.70103600 | 0.88523500   |
|          | C                             | 3.81080600  | -2.07291200 | 0.04553300   |
|          | H                             | 3.88444400  | -1.42959200 | 0.93003900   |
|          | H                             | 4.66624000  | -2.75602500 | 0.04050700   |
|          | H                             | 3.88706600  | -1.41320100 | -0.82651200  |
|          | AT-Cu                         |             |             |              |
|          | $E_{ZPE} = -1196.383341$ a.u. |             |             |              |
|          | N                             | 3.21396700  | -3.73267700 | -0.21357700  |
|          | C                             | 4.02881700  | -2.62496300 | -0.20872100  |
|          | C                             | 3.55272200  | -1.35658600 | -0.16768900  |
|          | C                             | 2.10194200  | -1.18565500 | -0.12786800  |
|          | N                             | 1.32313300  | -2.32156000 | -0.13351500  |

|                               |             |             |             |
|-------------------------------|-------------|-------------|-------------|
| C                             | 1.81580600  | -3.60129600 | -0.17496600 |
| O                             | 1.57035000  | -0.05533700 | -0.09027000 |
| Cu                            | -0.52263600 | -2.03874100 | -0.08607700 |
| N                             | -2.33791100 | -1.54654600 | -0.03577500 |
| C                             | -2.84450600 | -0.24886700 | 0.00086400  |
| C                             | -4.23901200 | -0.30517500 | 0.03044300  |
| N                             | -4.56810300 | -1.65094400 | 0.01104400  |
| C                             | -3.39685500 | -2.34272600 | -0.02811500 |
| C                             | -2.26203100 | 1.04924200  | 0.01327600  |
| N                             | -3.11284300 | 2.10225200  | 0.05216000  |
| C                             | -4.43148000 | 1.88649900  | 0.07688000  |
| N                             | -5.09275900 | 0.72159600  | 0.06910000  |
| N                             | -0.94703700 | 1.30622800  | -0.01058100 |
| C                             | -5.92006500 | -2.19119600 | 0.03251500  |
| O                             | 1.10247000  | -4.60635500 | -0.17976200 |
| C                             | 3.75156400  | -5.08958000 | -0.25798700 |
| H                             | -5.04918900 | 2.78177500  | 0.10758500  |
| H                             | -3.35565300 | -3.42231700 | -0.05032700 |
| H                             | -5.86680200 | -3.28055000 | -0.01395600 |
| H                             | -6.48372600 | -1.81363900 | -0.82415500 |
| H                             | -6.42881000 | -1.88676100 | 0.95071900  |
| H                             | -0.18962200 | 0.61298100  | -0.03956000 |
| H                             | -0.68381800 | 2.28229800  | 0.00275000  |
| H                             | 5.09392400  | -2.83576300 | -0.24052700 |
| H                             | 4.84203500  | -5.03541000 | -0.28602600 |
| H                             | 3.38622400  | -5.61438100 | -1.14496400 |
| H                             | 3.43386000  | -5.65377600 | 0.62318500  |
| C                             | 4.43297100  | -0.13934700 | -0.16247400 |
| H                             | 4.25910700  | 0.46763300  | 0.73385100  |
| H                             | 5.49269700  | -0.41509200 | -0.19444500 |
| H                             | 4.21622700  | 0.50620300  | -1.02174600 |
| AT-Ag                         |             |             |             |
| $E_{ZPE} = -1146.016851$ a.u. |             |             |             |
| N                             | 3.47947900  | -3.77151200 | -0.21979000 |
| C                             | 4.20514800  | -2.60394900 | -0.21192400 |
| C                             | 3.63138800  | -1.37646800 | -0.17138800 |
| C                             | 2.17076300  | -1.31959900 | -0.13472800 |
| N                             | 1.48681200  | -2.51250100 | -0.14342800 |
| C                             | 2.07275100  | -3.74952900 | -0.18450300 |
| O                             | 1.55334600  | -0.23324400 | -0.09645000 |
| Ag                            | -0.58797000 | -2.29225400 | -0.09141500 |
| N                             | -2.59903800 | -1.62012100 | -0.03189700 |
| C                             | -2.99640100 | -0.28598300 | 0.00398900  |
| C                             | -4.39232500 | -0.22834100 | 0.03614400  |
| N                             | -4.82985700 | -1.54254800 | 0.01916700  |
| C                             | -3.71712800 | -2.32581000 | -0.02128300 |
| C                             | -2.31380600 | 0.96386800  | 0.01389900  |
| N                             | -3.08071900 | 2.07992600  | 0.05288300  |
| C                             | -4.41154900 | 1.97079100  | 0.08007100  |
| N                             | -5.16274500 | 0.86194400  | 0.07489000  |
| N                             | -0.98370500 | 1.13181300  | -0.01197500 |
| C                             | -6.22140600 | -1.97043200 | 0.04364800  |
| O                             | 1.44260000  | -4.80801100 | -0.19201800 |
| C                             | 4.12050100  | -5.08228100 | -0.26506800 |
| H                             | -4.95597000 | 2.91256100  | 0.11066300  |
| H                             | -3.76629800 | -3.40524700 | -0.04222700 |
| H                             | -6.25753100 | -3.06068000 | 0.00113500  |
| H                             | -6.75347800 | -1.55108300 | -0.81379900 |
| H                             | -6.70259300 | -1.62205000 | 0.96106700  |

|                                          |             |             |             |
|------------------------------------------|-------------|-------------|-------------|
| H                                        | -0.26477000 | 0.40191100  | -0.04173100 |
| H                                        | -0.66059300 | 2.08982100  | -0.00001800 |
| H                                        | 5.28359100  | -2.73086600 | -0.24148300 |
| H                                        | 5.20369000  | -4.94428500 | -0.29120100 |
| H                                        | 3.79834000  | -5.63293000 | -1.15315600 |
| H                                        | 3.84596100  | -5.67096800 | 0.61462800  |
| C                                        | 4.41417200  | -0.09456800 | -0.16237400 |
| H                                        | 4.19316400  | 0.49555600  | 0.73504800  |
| H                                        | 5.49231300  | -0.28611200 | -0.19389100 |
| H                                        | 4.14882200  | 0.53465000  | -1.02019600 |
| <b>AT-Au</b>                             |             |             |             |
| <b>E<sub>ZPE</sub>=-1134.930465 a.u.</b> |             |             |             |
| N                                        | 3.41415200  | -3.76071100 | -0.21983900 |
| C                                        | 4.18519300  | -2.62253900 | -0.21093300 |
| C                                        | 3.66115400  | -1.37409900 | -0.16874700 |
| C                                        | 2.20531900  | -1.25005300 | -0.13167600 |
| N                                        | 1.47505800  | -2.42566800 | -0.14178300 |
| C                                        | 2.01155600  | -3.69179700 | -0.18493000 |
| O                                        | 1.63573800  | -0.14367100 | -0.09280900 |
| Au                                       | -0.55849300 | -2.16734700 | -0.09091300 |
| N                                        | -2.55466900 | -1.59557500 | -0.03349700 |
| C                                        | -2.98031000 | -0.27143900 | 0.00408900  |
| C                                        | -4.37638100 | -0.25317100 | 0.03420300  |
| N                                        | -4.77970200 | -1.57889100 | 0.01405700  |
| C                                        | -3.65037900 | -2.33652100 | -0.02608000 |
| C                                        | -2.32752800 | 0.99396600  | 0.01705300  |
| N                                        | -3.12266600 | 2.08938500  | 0.05654300  |
| C                                        | -4.45056200 | 1.94537200  | 0.08146900  |
| N                                        | -5.17337300 | 0.81758700  | 0.07355200  |
| N                                        | -1.00119900 | 1.19064000  | -0.00634700 |
| C                                        | -6.16047600 | -2.04170700 | 0.03750500  |
| O                                        | 1.34390800  | -4.72304800 | -0.19408700 |
| C                                        | 4.00463700  | -5.09569700 | -0.26648200 |
| H                                        | -5.01916800 | 2.87262100  | 0.11249200  |
| H                                        | -3.66356700 | -3.41618200 | -0.04938100 |
| H                                        | -6.16973200 | -3.13165700 | -0.02091200 |
| H                                        | -6.70499400 | -1.62281800 | -0.81216100 |
| H                                        | -6.64639800 | -1.71853300 | 0.96162600  |
| H                                        | -0.27855000 | 0.46630100  | -0.03654100 |
| H                                        | -0.69325900 | 2.15345800  | 0.00706600  |
| H                                        | 5.25755100  | -2.79213500 | -0.24052900 |
| H                                        | 5.09209700  | -4.99805300 | -0.28977300 |
| H                                        | 3.66370100  | -5.63129800 | -1.15663800 |
| H                                        | 3.70562900  | -5.67474400 | 0.61147700  |
| C                                        | 4.49409400  | -0.12419700 | -0.15906900 |
| H                                        | 4.29542200  | 0.47362100  | 0.73820200  |
| H                                        | 5.56348200  | -0.35941600 | -0.18943600 |
| H                                        | 4.25442400  | 0.51443800  | -1.01738000 |
| <b>AU</b>                                |             |             |             |
| <b>E<sub>ZPE</sub>=-960.355675 a.u.</b>  |             |             |             |
| C                                        | -4.32394300 | -0.27042100 | 0.02224600  |
| C                                        | -2.92715800 | -0.25840500 | 0.03134600  |
| C                                        | -2.30830700 | 1.01602400  | 0.04308300  |
| N                                        | -3.10816700 | 2.10565500  | 0.04485800  |
| C                                        | -4.43701400 | 1.93192300  | 0.03551600  |
| N                                        | -5.13831400 | 0.79233300  | 0.02374800  |

|                                            |             |             |             |
|--------------------------------------------|-------------|-------------|-------------|
| N                                          | -4.68175700 | -1.60763600 | 0.01153200  |
| C                                          | -3.50689400 | -2.31935000 | 0.01491500  |
| N                                          | -2.43844300 | -1.55256900 | 0.02644900  |
| N                                          | -0.97443200 | 1.19290800  | 0.05272500  |
| H                                          | -5.02416500 | 2.84865000  | 0.03737800  |
| C                                          | -6.04312000 | -2.11993400 | -0.00030400 |
| H                                          | -3.47660100 | -3.40151800 | 0.00832700  |
| H                                          | -6.23317300 | -2.73510900 | 0.88466500  |
| H                                          | -6.22612100 | -2.71434800 | -0.90081900 |
| H                                          | -6.71481100 | -1.25971100 | 0.00710300  |
| H                                          | -0.30481100 | 0.42309300  | 0.05018500  |
| H                                          | -0.63373900 | 2.14297300  | 0.05945900  |
| O                                          | 1.21561000  | -0.80585100 | 0.05198700  |
| C                                          | 1.27481800  | -2.03726000 | 0.04207300  |
| C                                          | 2.50407300  | -2.81231600 | 0.03943700  |
| N                                          | 0.11554400  | -2.81068200 | 0.03231400  |
| C                                          | 2.44007900  | -4.16420300 | 0.02780700  |
| C                                          | 0.02255900  | -4.18487200 | 0.01991900  |
| N                                          | 1.25347800  | -4.85798400 | 0.01833000  |
| H                                          | 3.33223000  | -4.78200000 | 0.02532200  |
| O                                          | -1.03908900 | -4.79503600 | 0.01091000  |
| H                                          | -0.79740700 | -2.30552000 | 0.03284800  |
| C                                          | 1.20172700  | -6.31944100 | 0.00492100  |
| H                                          | 2.22255200  | -6.70559400 | 0.00796700  |
| H                                          | 0.67730200  | -6.67151800 | -0.88714200 |
| H                                          | 0.66608300  | -6.68704700 | 0.88389400  |
| H                                          | 3.44997800  | -2.28794300 | 0.04679500  |
| <b>AU-Cu</b>                               |             |             |             |
| <b>E<sub>ZPE</sub> = -1157.105957 a.u.</b> |             |             |             |
| C                                          | -4.23242100 | -0.29990300 | 0.03003100  |
| C                                          | -2.83797600 | -0.24213800 | 0.00107000  |
| C                                          | -2.25691200 | 1.05667700  | 0.01395500  |
| N                                          | -3.10900000 | 2.10872300  | 0.05247500  |
| C                                          | -4.42733800 | 1.89151300  | 0.07652000  |
| N                                          | -5.08736500 | 0.72584100  | 0.06839300  |
| N                                          | -4.56017800 | -1.64602600 | 0.01033100  |
| C                                          | -3.38831000 | -2.33661000 | -0.02842900 |
| N                                          | -2.33007300 | -1.53939800 | -0.03554900 |
| N                                          | -0.94231300 | 1.31484700  | -0.00919000 |
| H                                          | -5.04608300 | 2.78608200  | 0.10699200  |
| C                                          | -5.91164000 | -2.18753400 | 0.03128800  |
| H                                          | -3.34616800 | -3.41615600 | -0.05077900 |
| H                                          | -5.85741000 | -3.27681000 | -0.01595300 |
| H                                          | -6.47552400 | -1.80983800 | -0.82516700 |
| H                                          | -6.42077300 | -1.88418800 | 0.94964000  |
| H                                          | -0.18467800 | 0.62182500  | -0.03710800 |
| H                                          | -0.67957700 | 2.29103900  | 0.00456700  |
| O                                          | 1.56881500  | -0.05294400 | -0.08472600 |
| C                                          | 2.10575500  | -1.17856700 | -0.12366700 |
| C                                          | 3.54588600  | -1.36676300 | -0.16267400 |
| N                                          | 1.33000100  | -2.32117500 | -0.13222200 |
| C                                          | 4.04170700  | -2.62566200 | -0.20605900 |
| C                                          | 1.82701900  | -3.59803600 | -0.17559100 |
| N                                          | 3.23110900  | -3.73137400 | -0.21375200 |
| H                                          | 5.10751000  | -2.83007000 | -0.23729600 |
| O                                          | 1.12067100  | -4.60665800 | -0.18338800 |
| Cu                                         | -0.51499900 | -2.03240900 | -0.08536500 |
| C                                          | 3.76627600  | -5.08935700 | -0.26049100 |
| H                                          | 4.85690500  | -5.03671600 | -0.28722700 |
| H                                          | 3.40062100  | -5.61112500 | -1.14896100 |

|                             |             |             |             |
|-----------------------------|-------------|-------------|-------------|
| H                           | 3.44623200  | -5.65431700 | 0.61916200  |
| H                           | 4.19253500  | -0.49922100 | -0.15728000 |
| <b>AU-Ag</b>                |             |             |             |
| $E_{ZPE}=-1106.739498$ a.u. |             |             |             |
| C                           | -4.39398900 | -0.22488400 | 0.03606100  |
| C                           | -2.99788800 | -0.27843500 | 0.00431400  |
| C                           | -2.31901000 | 0.97359900  | 0.01507900  |
| N                           | -3.08941700 | 2.08728600  | 0.05429000  |
| C                           | -4.41988400 | 1.97414900  | 0.08090700  |
| N                           | -5.16775700 | 0.86301600  | 0.07507300  |
| N                           | -4.82771600 | -1.54032000 | 0.01828200  |
| C                           | -3.71277300 | -2.32037400 | -0.02226000 |
| N                           | -2.59669700 | -1.61138000 | -0.03217500 |
| N                           | -0.98953200 | 1.14538000  | -0.01029000 |
| H                           | -4.96708600 | 2.91426100  | 0.11191300  |
| C                           | -6.21802200 | -1.97226700 | 0.04212200  |
| H                           | -3.75886800 | -3.39991800 | -0.04382300 |
| H                           | -6.25099900 | -3.06257500 | -0.00143000 |
| H                           | -6.75114600 | -1.55361200 | -0.81500700 |
| H                           | -6.70040000 | -1.62611500 | 0.95976200  |
| H                           | -0.26887100 | 0.41718600  | -0.03987200 |
| H                           | -0.66890300 | 2.10420700  | 0.00229300  |
| O                           | 1.54144800  | -0.22219700 | -0.09249200 |
| C                           | 2.16740800  | -1.30139400 | -0.13205700 |
| C                           | 3.61893700  | -1.37169100 | -0.16789800 |
| N                           | 1.49058200  | -2.50287600 | -0.14271100 |
| C                           | 4.21523300  | -2.58641200 | -0.21005400 |
| C                           | 2.08442200  | -3.73484200 | -0.18490600 |
| N                           | 3.49738800  | -3.75393800 | -0.21953000 |
| H                           | 5.29430700  | -2.70337700 | -0.23858400 |
| O                           | 1.46484500  | -4.79833000 | -0.19403200 |
| Ag                          | -0.58452500 | -2.28047200 | -0.09129200 |
| C                           | 4.14018500  | -5.06398700 | -0.26558300 |
| H                           | 5.22323200  | -4.92420400 | -0.29055800 |
| H                           | 3.81917900  | -5.61355300 | -1.15457900 |
| H                           | 3.86520700  | -5.65354900 | 0.61320500  |
| H                           | 4.19341600  | -0.45483300 | -0.16061700 |
| <b>AU-Au</b>                |             |             |             |
| $E_{ZPE}=-1095.653310$ a.u. |             |             |             |
| C                           | -4.37717300 | -0.25108400 | 0.03385400  |
| C                           | -2.98107400 | -0.26582300 | 0.00468700  |
| C                           | -2.33144300 | 1.00134400  | 0.01836600  |
| N                           | -3.12956600 | 2.09465100  | 0.05755000  |
| C                           | -4.45704200 | 1.94727300  | 0.08159000  |
| N                           | -5.17699500 | 0.81760100  | 0.07290600  |
| N                           | -4.77714700 | -1.57778200 | 0.01311900  |
| C                           | -3.64598900 | -2.33263000 | -0.02641500 |
| N                           | -2.55210500 | -1.58884100 | -0.03291600 |
| N                           | -1.00577000 | 1.20121700  | -0.00407300 |
| H                           | -5.02801500 | 2.87304400  | 0.11232000  |
| C                           | -6.15682600 | -2.04392200 | 0.03554700  |
| H                           | -3.65655700 | -3.41229400 | -0.04994900 |
| H                           | -6.16343600 | -3.13386900 | -0.02331900 |
| H                           | -6.70182200 | -1.62597200 | -0.81427000 |
| H                           | -6.64408700 | -1.72227000 | 0.95949000  |
| H                           | -0.28092700 | 0.47887400  | -0.03407100 |
| H                           | -0.70019000 | 2.16480800  | 0.00968700  |

|    |             |             |             |
|----|-------------|-------------|-------------|
| O  | 1.62723200  | -0.12754600 | -0.08888700 |
| C  | 2.20365700  | -1.22799500 | -0.12845000 |
| C  | 3.64971500  | -1.36762900 | -0.16544500 |
| N  | 1.47894900  | -2.41203700 | -0.14004000 |
| C  | 4.19550000  | -2.60468800 | -0.20908600 |
| C  | 2.02218500  | -3.67394600 | -0.18441600 |
| N  | 3.43074700  | -3.74225900 | -0.21924700 |
| H  | 5.26866300  | -2.76574400 | -0.23842400 |
| O  | 1.36320900  | -4.70964100 | -0.19508800 |
| Au | -0.55531400 | -2.15774700 | -0.08958300 |
| C  | 4.02127400  | -5.07741700 | -0.26739100 |
| H  | 5.10879400  | -4.97935900 | -0.28869200 |
| H  | 3.68154500  | -5.61100300 | -1.15906000 |
| H  | 3.72045100  | -5.65747600 | 0.60907200  |
| H  | 4.26066300  | -0.47484800 | -0.15780600 |

DT

$E_{ZPE} = -983.570270$  a.u.

|   |             |             |             |
|---|-------------|-------------|-------------|
| C | -4.31699900 | -0.25260100 | 0.01728700  |
| C | -2.91471600 | -0.20490100 | 0.08586700  |
| C | -2.27870100 | 1.05796400  | 0.10857100  |
| C | -3.17477100 | 2.14928900  | 0.04963400  |
| C | -4.55883800 | 1.95151900  | -0.01775800 |
| N | -5.18186500 | 0.76192000  | -0.03564300 |
| N | -4.63437100 | -1.60458200 | 0.00999100  |
| C | -3.44667300 | -2.28315800 | 0.07114400  |
| N | -2.39826900 | -1.49006200 | 0.11785200  |
| N | -0.93137500 | 1.19538800  | 0.20522200  |
| H | -2.78489800 | 3.16378900  | 0.06099700  |
| H | -5.20912800 | 2.82380300  | -0.06064100 |
| C | -5.97587100 | -2.15575000 | -0.04756600 |
| H | -3.38877500 | -3.36448500 | 0.07587900  |
| H | -5.90990100 | -3.24554900 | -0.07899800 |
| H | -6.49301900 | -1.79549800 | -0.94146200 |
| H | -6.55140400 | -1.85107700 | 0.83171300  |
| H | -0.29623400 | 0.40166100  | 0.12572100  |
| H | -0.52443500 | 2.11125400  | 0.09377500  |
| O | 1.26436800  | -0.81248400 | 0.01007800  |
| C | 1.29570000  | -2.04704300 | 0.01221900  |
| C | 2.52880100  | -2.82989800 | -0.03630600 |
| N | 0.12404100  | -2.79114000 | 0.06239900  |
| C | 2.42079300  | -4.18072600 | -0.03156100 |
| C | 3.83915300  | -2.09813800 | -0.08827700 |
| C | 0.00338900  | -4.16385900 | 0.06039800  |
| N | 1.21811100  | -4.85376900 | 0.01516900  |
| H | 3.29797300  | -4.81961600 | -0.06558700 |
| O | -1.07111400 | -4.75302600 | 0.09486800  |
| H | -0.77706700 | -2.26187100 | 0.09657400  |
| C | 1.14362700  | -6.31379400 | 0.01196600  |
| H | 2.15794300  | -6.71624100 | -0.00947400 |
| H | 0.59030100  | -6.66434000 | -0.86345200 |
| H | 0.62593400  | -6.66798700 | 0.90711900  |
| H | 4.68298700  | -2.79499000 | -0.11915900 |
| H | 3.89079000  | -1.44985000 | -0.97069900 |
| H | 3.95813700  | -1.44599000 | 0.78469200  |

DT-Cu

$E_{ZPE} = -1180.320988$  a.u.



|    |             |             |             |
|----|-------------|-------------|-------------|
| C  | -4.24672000 | -0.28503000 | 0.03053100  |
| C  | -2.84610300 | -0.19428200 | 0.00213200  |
| C  | -2.24624500 | 1.09233400  | 0.01522600  |
| C  | -3.19169200 | 2.14675400  | 0.05686900  |
| C  | -4.56642200 | 1.90552800  | 0.08166600  |
| N  | -5.14736800 | 0.69376400  | 0.06986700  |
| N  | -4.53770100 | -1.64482900 | 0.00867800  |
| C  | -3.35365500 | -2.30547900 | -0.03013800 |
| N  | -2.31351500 | -1.48358800 | -0.03579400 |
| N  | -0.91507500 | 1.31639000  | -0.00923400 |
| H  | -2.83547300 | 3.17318800  | 0.06996000  |
| H  | -5.24700300 | 2.75404300  | 0.11341500  |
| C  | -5.87516700 | -2.21604600 | 0.02807300  |
| H  | -3.28480800 | -3.38376200 | -0.05373700 |
| H  | -5.79729400 | -3.30405300 | -0.01922700 |
| H  | -6.44729400 | -1.85020500 | -0.82829800 |
| H  | -6.39287700 | -1.92359700 | 0.94539100  |
| H  | -0.18104700 | 0.60084300  | -0.03750200 |
| H  | -0.58504700 | 2.27012100  | 0.00405500  |
| O  | 1.62543500  | -0.02497700 | -0.08798300 |
| C  | 2.14005300  | -1.16274400 | -0.12679300 |
| C  | 3.58853500  | -1.35594900 | -0.16554400 |
| N  | 1.34387600  | -2.28671600 | -0.13273600 |
| C  | 4.04567900  | -2.63112300 | -0.20675100 |
| C  | 4.48687900  | -0.15203500 | -0.15932600 |
| C  | 1.81731400  | -3.57324100 | -0.17423100 |
| N  | 3.21391400  | -3.72606700 | -0.21234900 |
| H  | 5.10752900  | -2.85809900 | -0.23805000 |
| O  | 1.09012900  | -4.56845100 | -0.17986900 |
| Cu | -0.49861300 | -1.97567900 | -0.08527600 |
| C  | 3.73038500  | -5.09093300 | -0.25674800 |
| H  | 4.82166500  | -5.05380200 | -0.28332700 |
| H  | 3.35812500  | -5.60982200 | -1.14437500 |
| H  | 3.40275600  | -5.65067700 | 0.62365400  |
| H  | 5.54251200  | -0.44332600 | -0.19079700 |
| H  | 4.28024000  | 0.49703900  | -1.01849900 |
| H  | 4.32153700  | 0.45722200  | 0.73713300  |

DT-Ag

$E_{ZPE} = -1129.954449$  a.u.

|   |             |             |             |
|---|-------------|-------------|-------------|
| C | -4.40619400 | -0.20714200 | 0.03619600  |
| C | -3.00130300 | -0.22877000 | 0.00535500  |
| C | -2.30437200 | 1.00953400  | 0.01480500  |
| C | -3.16671800 | 2.13336300  | 0.05542500  |
| C | -4.55547000 | 2.00117800  | 0.08277500  |
| N | -5.22834300 | 0.83813700  | 0.07461900  |
| N | -4.80490200 | -1.53896600 | 0.01790100  |
| C | -3.67584300 | -2.29066000 | -0.02139000 |
| N | -2.57537300 | -1.55611000 | -0.03047000 |
| N | -0.96043400 | 1.14514200  | -0.01166700 |
| H | -2.73145800 | 3.12883100  | 0.06567500  |
| H | -5.16778700 | 2.90026500  | 0.11358900  |
| C | -6.18408100 | -2.00026300 | 0.04091200  |
| H | -3.69576000 | -3.37111900 | -0.04280400 |
| H | -6.19477900 | -3.09118200 | -0.00267700 |
| H | -6.72619300 | -1.59206600 | -0.81585000 |
| H | -6.67509100 | -1.66357300 | 0.95772600  |
| H | -0.26836300 | 0.39249000  | -0.03954500 |
| H | -0.57004100 | 2.07577700  | -0.00051800 |
| O | 1.60475100  | -0.20091100 | -0.09081300 |

|    |             |             |             |
|----|-------------|-------------|-------------|
| C  | 2.20713500  | -1.29527700 | -0.13035000 |
| C  | 3.66722300  | -1.37295800 | -0.16762600 |
| N  | 1.50641300  | -2.47871400 | -0.14051700 |
| C  | 4.22399500  | -2.60799800 | -0.21055600 |
| C  | 4.46792100  | -0.10218300 | -0.15737400 |
| C  | 2.07511200  | -3.72331700 | -0.18391600 |
| N  | 3.48191300  | -3.76512900 | -0.21976000 |
| H  | 5.30062400  | -2.74995500 | -0.24033600 |
| O  | 1.43137500  | -4.77365500 | -0.19295100 |
| Ag | -0.56625000 | -2.22771400 | -0.08828300 |
| C  | 4.10424200  | -5.08458500 | -0.26707000 |
| H  | 5.18933700  | -4.96189500 | -0.29259000 |
| H  | 3.77467300  | -5.62920500 | -1.15619800 |
| H  | 3.82111600  | -5.67109300 | 0.61139600  |
| H  | 5.54337500  | -0.30914200 | -0.18654300 |
| H  | 4.21353400  | 0.53054900  | -1.01603900 |
| H  | 4.25346100  | 0.49103300  | 0.73953100  |

DT-Au

$E_{ZPE} = -1118.868450$  a.u.

|    |             |             |             |
|----|-------------|-------------|-------------|
| C  | -4.38934600 | -0.23265600 | 0.03397300  |
| C  | -2.98513300 | -0.21343200 | 0.00641400  |
| C  | -2.31921300 | 1.04171900  | 0.01906200  |
| C  | -3.21174700 | 2.14143600  | 0.05904900  |
| C  | -4.59668500 | 1.97115300  | 0.08297500  |
| N  | -5.23836200 | 0.79061700  | 0.07189600  |
| N  | -4.75264100 | -1.57508100 | 0.01282900  |
| C  | -3.60745200 | -2.30006300 | -0.02496900 |
| N  | -2.53057500 | -1.53041100 | -0.03028800 |
| N  | -0.97876700 | 1.20892800  | -0.00380800 |
| H  | -2.80406900 | 3.14838800  | 0.07160300  |
| H  | -5.23304500 | 2.85331400  | 0.11339100  |
| C  | -6.11989000 | -2.07188200 | 0.03371100  |
| H  | -3.59085900 | -3.37974700 | -0.04827500 |
| H  | -6.10271700 | -3.16188500 | -0.02489300 |
| H  | -6.67379800 | -1.66554400 | -0.81618800 |
| H  | -6.61629500 | -1.76021800 | 0.95643700  |
| H  | -0.28197500 | 0.46198000  | -0.03278500 |
| H  | -0.60623300 | 2.14669600  | 0.00746400  |
| O  | 1.69026400  | -0.11248600 | -0.08742300 |
| C  | 2.24328400  | -1.22674600 | -0.12761800 |
| C  | 3.69763500  | -1.37256800 | -0.16593600 |
| N  | 1.49563200  | -2.39168100 | -0.13811200 |
| C  | 4.20355300  | -2.62820500 | -0.21013100 |
| C  | 4.54875600  | -0.13499000 | -0.15541600 |
| C  | 2.01371700  | -3.66478600 | -0.18357500 |
| N  | 3.41564600  | -3.75468600 | -0.21966000 |
| H  | 5.27332600  | -2.81352600 | -0.24078000 |
| O  | 1.33224300  | -4.68714400 | -0.19384400 |
| Au | -0.53598700 | -2.10490700 | -0.08588500 |
| C  | 3.98602300  | -5.09806700 | -0.26874200 |
| H  | 5.07494500  | -5.01679900 | -0.28933500 |
| H  | 3.63919300  | -5.62645400 | -1.16101400 |
| H  | 3.67630600  | -5.67496900 | 0.60691400  |
| H  | 5.61474400  | -0.38552800 | -0.18552000 |
| H  | 4.31870600  | 0.50759700  | -1.01347000 |
| H  | 4.35826200  | 0.46534900  | 0.74200900  |

DU

| E <sub>ZPE</sub> =-944.292314 a.u.  |             |             |             |
|-------------------------------------|-------------|-------------|-------------|
| C                                   | 0.00085300  | -0.00096900 | -0.00065400 |
| C                                   | 1.40562900  | -0.00140500 | -0.00152600 |
| C                                   | 2.08477500  | 1.23921200  | -0.00148400 |
| C                                   | 1.22439000  | 2.36049600  | -0.00855500 |
| C                                   | -0.16716000 | 2.21022600  | -0.00864400 |
| N                                   | -0.83054000 | 1.04248300  | -0.00367300 |
| N                                   | -0.36281100 | -1.34124300 | -0.00068500 |
| C                                   | 0.80231300  | -2.06026400 | -0.00289000 |
| N                                   | 1.87855100  | -1.30379000 | -0.00353700 |
| N                                   | 3.43881300  | 1.33098200  | 0.02946100  |
| H                                   | 1.64862300  | 3.36114200  | -0.00934000 |
| H                                   | -0.78862100 | 3.10428900  | -0.01327100 |
| C                                   | -1.72380800 | -1.84561800 | 0.00576700  |
| H                                   | 0.82238100  | -3.14290500 | -0.00735500 |
| H                                   | -1.69747500 | -2.93678900 | -0.03533100 |
| H                                   | -2.27210200 | -1.46100500 | -0.85893300 |
| H                                   | -2.24374300 | -1.52787400 | 0.91453600  |
| H                                   | 4.04315300  | 0.51787700  | -0.08608000 |
| H                                   | 3.87053100  | 2.23386900  | -0.09428600 |
| O                                   | 5.55440400  | -0.74073400 | -0.28508200 |
| C                                   | 5.54698700  | -1.97339400 | -0.29321400 |
| N                                   | 4.35213400  | -2.68313400 | -0.19078600 |
| C                                   | 6.59278700  | -4.15916300 | -0.40669600 |
| C                                   | 4.18632900  | -4.05013300 | -0.19698700 |
| N                                   | 5.37453200  | -4.78825500 | -0.30642000 |
| H                                   | 7.44675000  | -4.82375000 | -0.48809900 |
| O                                   | 3.09775300  | -4.60559700 | -0.11438500 |
| H                                   | 3.47028800  | -2.12639500 | -0.10900900 |
| C                                   | 5.24289700  | -6.24455900 | -0.31550400 |
| H                                   | 6.23865300  | -6.68577000 | -0.38779600 |
| H                                   | 4.63547300  | -6.56550700 | -1.16586800 |
| H                                   | 4.75458300  | -6.58517000 | 0.60097500  |
| C                                   | 6.72844700  | -2.81286700 | -0.40543000 |
| H                                   | 7.69735500  | -2.33864300 | -0.48573700 |
| DU-Cu                               |             |             |             |
| E <sub>ZPE</sub> =-1141.043525 a.u. |             |             |             |
| C                                   | 0.00027800  | 0.00082900  | 0.00042300  |
| C                                   | 1.40409800  | 0.00239200  | -0.00064100 |
| C                                   | 2.08459500  | 1.24829400  | 0.00024800  |
| C                                   | 1.20749400  | 2.36102100  | 0.00221600  |
| C                                   | -0.17994300 | 2.20787600  | 0.00305100  |
| N                                   | -0.83670700 | 1.03525900  | 0.00230100  |
| N                                   | -0.37603200 | -1.33815000 | -0.00120300 |
| C                                   | 0.76418800  | -2.07289200 | -0.00281700 |
| N                                   | 1.85427400  | -1.31833600 | -0.00279800 |
| N                                   | 3.42762000  | 1.38707800  | -0.00086700 |
| H                                   | 1.62798000  | 3.36285200  | 0.00309700  |
| H                                   | -0.80566500 | 3.09816900  | 0.00450300  |
| C                                   | -1.74734800 | -1.82284900 | 0.00190800  |
| H                                   | 0.76523900  | -3.15359300 | -0.00436800 |
| H                                   | -1.73834200 | -2.91438900 | -0.02096100 |
| H                                   | -2.27796200 | -1.44043100 | -0.87373600 |
| H                                   | -2.26314700 | -1.47770200 | 0.90181000  |
| H                                   | 4.11472500  | 0.62595200  | -0.00095100 |
| H                                   | 3.81768800  | 2.31791200  | 0.00069300  |
| O                                   | 5.87376100  | -0.11843900 | -0.00263000 |
| C                                   | 6.31860600  | -1.28373600 | -0.00573500 |

|                             |             |             |             |
|-----------------------------|-------------|-------------|-------------|
| N                           | 5.45225700  | -2.35977300 | -0.00728200 |
| C                           | 8.13169100  | -2.88548100 | -0.00972400 |
| C                           | 5.84399200  | -3.67277800 | -0.01003400 |
| N                           | 7.23351300  | -3.92134000 | -0.01150400 |
| H                           | 9.17755000  | -3.17710300 | -0.01080000 |
| O                           | 5.05872600  | -4.62156300 | -0.01158700 |
| Cu                          | 3.63434800  | -1.92606200 | -0.00491200 |
| C                           | 7.65611500  | -5.31899800 | -0.01449900 |
| H                           | 8.74777900  | -5.35678000 | -0.01580600 |
| H                           | 7.26885200  | -5.83104500 | -0.89950500 |
| H                           | 7.27087100  | -5.83429900 | 0.86951200  |
| C                           | 7.73953600  | -1.58988800 | -0.00677200 |
| H                           | 8.45450100  | -0.77761900 | -0.00527400 |
| <b>DU-Ag</b>                |             |             |             |
| $E_{ZPE}=-1090.677082$ a.u. |             |             |             |
| C                           | 0.00023500  | 0.00116900  | 0.00068500  |
| C                           | 1.40565100  | 0.00119300  | -0.00064000 |
| C                           | 2.08298800  | 1.25051000  | 0.00028500  |
| C                           | 1.20246700  | 2.36101300  | 0.00266900  |
| C                           | -0.18427100 | 2.20724000  | 0.00377500  |
| N                           | -0.83872800 | 1.03368800  | 0.00290600  |
| N                           | -0.37752600 | -1.33684300 | -0.00117600 |
| C                           | 0.76341100  | -2.07130200 | -0.00306700 |
| N                           | 1.85252500  | -1.31987700 | -0.00301300 |
| N                           | 3.42468100  | 1.40726500  | -0.00124900 |
| H                           | 1.62191800  | 3.36329900  | 0.00359500  |
| H                           | -0.81097800 | 3.09689500  | 0.00548000  |
| C                           | -1.74971400 | -1.81905300 | 0.00183800  |
| H                           | 0.76024900  | -3.15215300 | -0.00477100 |
| H                           | -1.74298500 | -2.91064900 | -0.02038000 |
| H                           | -2.27955900 | -1.43601300 | -0.87401000 |
| H                           | -2.26524500 | -1.47224400 | 0.90125100  |
| H                           | 4.12947700  | 0.66579800  | -0.00186800 |
| H                           | 3.79993200  | 2.34420900  | 0.00026600  |
| O                           | 6.00378300  | 0.09768700  | -0.00318400 |
| C                           | 6.62799300  | -0.98277700 | -0.00672400 |
| N                           | 5.94892200  | -2.18326200 | -0.00863100 |
| C                           | 8.67519600  | -2.27285800 | -0.01220200 |
| C                           | 6.54123700  | -3.41654400 | -0.01251000 |
| N                           | 7.95468300  | -3.43915000 | -0.01429600 |
| H                           | 9.75433700  | -2.39255700 | -0.01373300 |
| O                           | 5.92040200  | -4.47953800 | -0.01398000 |
| Ag                          | 3.87210500  | -1.96135600 | -0.00588900 |
| C                           | 8.59512200  | -4.75098900 | -0.01823100 |
| H                           | 9.67887200  | -4.61394800 | -0.02034800 |
| H                           | 8.29403600  | -5.31838600 | -0.90303300 |
| H                           | 8.29799100  | -5.32196700 | 0.86563500  |
| C                           | 8.08034300  | -1.05701200 | -0.00845200 |
| H                           | 8.65619100  | -0.14082700 | -0.00676900 |
| <b>DU-Au</b>                |             |             |             |
| $E_{ZPE}=-1079.554510$ a.u. |             |             |             |
| C                           | 0.02864300  | -0.02193100 | 0.00098600  |
| C                           | 1.43276000  | 0.01478100  | -0.00058700 |
| C                           | 2.08258400  | 1.27853600  | 0.00064600  |
| C                           | 1.17543000  | 2.36712600  | 0.00345500  |
| C                           | -0.20738400 | 2.17943800  | 0.00474100  |
| N                           | -0.83386000 | 0.99066700  | 0.00365400  |

|  |    |             |             |             |
|--|----|-------------|-------------|-------------|
|  | N  | -0.31749300 | -1.36905100 | -0.00123400 |
|  | C  | 0.83696900  | -2.07998900 | -0.00358900 |
|  | N  | 1.90422500  | -1.29692700 | -0.00339700 |
|  | N  | 3.42071500  | 1.46308900  | -0.00081700 |
|  | H  | 1.57013700  | 3.37931700  | 0.00461500  |
|  | H  | -0.85526700 | 3.05370000  | 0.00680100  |
|  | C  | -1.67871100 | -1.88256100 | 0.00157000  |
|  | H  | 0.86698400  | -3.15962900 | -0.00568100 |
|  | H  | -1.64680500 | -2.97359900 | -0.01933800 |
|  | H  | -2.21609500 | -1.51244600 | -0.87516000 |
|  | H  | -2.20183700 | -1.54622400 | 0.90047600  |
|  | H  | 4.12858000  | 0.72579400  | -0.00235600 |
|  | H  | 3.78053600  | 2.40592000  | 0.00056400  |
|  | O  | 6.09706900  | 0.18103300  | -0.00490500 |
|  | C  | 6.67093900  | -0.92106600 | -0.00784500 |
|  | N  | 5.94295600  | -2.10351500 | -0.00941600 |
|  | C  | 8.66076100  | -2.30417900 | -0.01251800 |
|  | C  | 6.48366200  | -3.36677600 | -0.01258600 |
|  | N  | 7.89293200  | -3.43966000 | -0.01414400 |
|  | H  | 9.73388200  | -2.46851400 | -0.01386500 |
|  | O  | 5.82329600  | -4.40188500 | -0.01373300 |
|  | C  | 8.48007600  | -4.77691100 | -0.01732900 |
|  | H  | 9.56817300  | -4.68232300 | -0.01894500 |
|  | H  | 8.15687900  | -5.33163500 | -0.90224000 |
|  | H  | 8.15980900  | -5.33469500 | 0.86674300  |
|  | C  | 8.11752400  | -1.06535700 | -0.00943300 |
|  | H  | 8.73102300  | -0.17422200 | -0.00815400 |
|  | Au | 3.90665000  | -1.84564600 | -0.00674800 |
